# Supplementary material for: Macrobenthic molluscs from a marine - lagoonal environmental transition in Lesvos Island (Greece)
Source: Biodivers Data J. 2016 Nov 1;(4):e9541. doi: 10.3897/BDJ.4.e9541 (PMC5136663; doi:10.3897/BDJ.4.e9541)
Supplement: Supplementary material 1 — The dataset [file biodiversity_data_journal-4-e9541-s001.xlsx]

## Sheet: SPECIES LIST
Scientific name	Authority	Class	Family
Abra segmentum	(Récluz, 1843)	Bivalvia	Semelidae
Axinulus croulinensis	(Jeffreys, 1847)	Bivalvia	Thyasiridae
Cerastoderma glaucum	(Bruguière, 1789)	Bivalvia	Cardiidae
Chamelea gallina	(Linnaeus, 1758)	Bivalvia	Veneridae
Clausinella fasciata	(da Costa, 1778)	Bivalvia	Veneridae
Corbula gibba	(Olivi, 1792)	Bivalvia	Corbulidae
Ctena decussata	(O. G. Costa, 1829)	Bivalvia	Lucinidae
Lucinella divaricata	(Linnaeus, 1758)	Bivalvia	Lucinidae
Donacilla cornea	(Poli, 1791)	Bivalvia	Mesodesmatidae
Donax venustus	Poli, 1795	Bivalvia	Donacidae
Gouldia minima	(Montagu, 1803)	Bivalvia	Veneridae
Irus irus	(Linnaeus, 1758)	Bivalvia	Veneridae
Loripes lucinalis	(Lamarck, 1818)	Bivalvia	Lucinidae
Loripinus fragilis	(Philippi, 1836)	Bivalvia	Lucinidae
Gibbomodiola adriatica	(Lamarck, 1819)	Bivalvia	Mytilidae
Modiolus barbatus	(Linnaeus, 1758)	Bivalvia	Mytilidae
Montacuta substriata	(Montagu, 1808)	Bivalvia	Montacutidae
Musculus sp.	Röding, 1798	Bivalvia	Mytilidae
Myrtea spinifera	(Montagu, 1803)	Bivalvia	Lucinidae
Kurtiella bidentata	(Montagu, 1803)	Bivalvia	Montacutidae
Parvicardium exiguum	(Gmelin, 1791)	Bivalvia	Cardiidae
Pholas dactylus	Linnaeus, 1758	Bivalvia	Pholadidae
Pitar rudis	(Poli, 1795)	Bivalvia	Veneridae
Solen marginatus	Pulteney, 1799	Bivalvia	Solenidae
Polititapes aureus	(Gmelin, 1791)	Bivalvia	Veneridae
Ruditapes decussatus	(Linnaeus, 1758)	Bivalvia	Veneridae
Moerella donacina	(Linnaeus, 1758)	Bivalvia	Tellinidae
Tellina planata	Linnaeus, 1758	Bivalvia	Tellinidae
Tellina sp.	Linnaeus, 1758	Bivalvia	Tellinidae
Tellina tenuis	da Costa, 1778	Bivalvia	Tellinidae
Thracia phaseolina	(Lamarck, 1818)	Bivalvia	Thraciidae
Thyasira flexuosa	(Montagu, 1803)	Bivalvia	Thyasiridae
Timoclea ovata	(Pennant, 1777)	Bivalvia	Veneridae
Venus casina	Linnaeus, 1758	Bivalvia	Veneridae
Acteon tornatilis	(Linnaeus, 1758)	Gastropoda	Acteonidae
Barleeia unifasciata	(Montagu, 1803)	Gastropoda	Barleeiidae
Bela nebula	(Montagu, 1803)	Gastropoda	Mangeliidae
Bittium reticulatum	(da Costa, 1778)	Gastropoda	Cerithiidae
Cerithiopsis sp.	Forbes & Hanley, 1850	Gastropoda	Cerithiopsidae
Cerithiopsis tubercularis	(Montagu, 1803)	Gastropoda	Cerithiopsidae
Cerithium vulgatum	Bruguière, 1792	Gastropoda	Cerithiidae
Chrysallida sp.	Carpenter, 1856	Gastropoda	Pyramidellidae
Circulus sp.	Jeffreys, 1865	Gastropoda	Tornidae
Cyclope neritea	(Linnaeus, 1758)	Gastropoda	Nassariidae
Ebala pointeli	(de Folin, 1868)	Gastropoda	Pyramidellidae
Epitonium clathrus	(Linnaeus, 1758)	Gastropoda	Epitoniidae
Gibbula albida	(Gmelin, 1791)	Gastropoda	Trochidae
Gibbula ardens	(Salis Marschlins, 1793)	Gastropoda	Trochidae
Hydrobia acuta	(Draparnaud, 1805)	Gastropoda	Hydrobiidae
Mangelia attenuata	(Montagu, 1803)	Gastropoda	Mangeliidae
Nassarius incrassatus	(Strøm, 1768)	Gastropoda	Nassariidae
Megastomia conoidea	(Brocchi, 1814)	Gastropoda	Pyramidellidae
Potamides conicus	(Blainville, 1829)	Gastropoda	Potamididae
Pusillina marginata	(Michaud, 1830)	Gastropoda	Rissoidae
Pusillina radiata	(Philippi, 1836)	Gastropoda	Rissoidae
Raphitoma echinata	(Brocchi, 1814)	Gastropoda	Raphitomidae
Rissoa guerinii	Récluz, 1843	Gastropoda	Rissoidae
Rissoa monodonta	Philippi, 1836	Gastropoda	Rissoidae
Rissoa membranacea	(J. Adams, 1800)	Gastropoda	Rissoidae
Rissoa lia	(Monterosato, 1884)	Gastropoda	Rissoidae
Rissoa splendida	Eichwald, 1830	Gastropoda	Rissoidae
Rissoa variabilis	(Von Mühlfeldt, 1824)	Gastropoda	Rissoidae
Rissoa ventricosa	Desmarest, 1814	Gastropoda	Rissoidae
Tricolia pullus	(Linnaeus, 1758)	Gastropoda	Phasianellidae
Monophorus perversus	(Linnaeus, 1758)	Gastropoda	Triphoridae
Trophonopsis muricata	(Montagu, 1803)	Gastropoda	Muricidae
Truncatella subcylindrica	(Linnaeus, 1767)	Gastropoda	Truncatellidae
Turbonilla delicata	Monterosato, 1874	Gastropoda	Pyramidellidae
Turbonilla lactea	(Linnaeus, 1758)	Gastropoda	Pyramidellidae
Pyrgostylus striatulus	(Linnaeus, 1758)	Gastropoda	Pyramidellidae
Fustiaria rubescens	(Deshayes, 1825)	Scaphopoda	Fustiariidae

## Sheet: ABUNDANCE
	WI1R1	WI1R2	WI1R3	WI2R1	WI2R2	WI2R3	WI3R1	WI3R2	WI3R3	WI4R1	WI4R2	WI4R3	SP1R1	SP1R2	SP1R3	SP2R1	SP2R2	SP2R3	SP3R1	SP3R2	SP3R3	SP4R1	SP4R2	SP4R3	SU1R1	SU1R2	SU1R3	SU2R1	SU2R2	SU2R3	SU3R1	SU3R2	SU3R3	SU4R1	SU4R2	SU4R3	AU1R1	AU1R2	AU1R3	AU2R1	AU2R2	AU2R3	AU3R1	AU3R2	AU3R3	AU4R1	AU4R2	AU4R3
Abra segmentum	0	0	0	0	0	0	61	48	38	4	2	8	0	0	0	0	4	0	29	6	17	6	5	8	0	0	0	8	12	7	0	0	18	3	3	7	0	1	0	2	7	10	24	35	44	6	19	3
Axinulus croulinensis	0	0	0	0	0	0	0	0	0	0	0	0	0	0	0	0	0	0	0	0	0	0	0	0	0	0	0	0	0	0	0	0	0	0	0	0	0	0	1	0	0	0	0	0	0	0	0	0
Cerastoderma glaucum	0	0	0	0	2	0	6	4	8	4	2	5	0	0	0	0	1	1	1	1	0	0	0	2	0	0	0	0	1	0	2	1	3	2	2	0	0	0	0	0	0	1	1	3	0	1	1	5
Chamelea gallina	1	1	1	0	0	0	0	0	0	0	0	0	0	0	0	0	0	0	0	0	0	0	0	0	0	2	6	0	0	0	0	0	0	0	0	0	0	0	0	0	0	0	0	0	0	0	0	0
Clausinella fasciata	0	0	0	0	0	0	0	0	0	0	0	0	0	0	0	0	0	0	0	0	0	0	0	0	0	1	0	0	0	0	0	0	0	0	0	0	0	0	0	0	0	0	0	0	0	0	0	0
Corbula gibba	0	0	0	0	0	0	0	0	0	0	0	0	0	0	0	0	0	0	0	0	0	0	0	0	0	0	0	1	0	0	0	0	0	0	0	0	0	0	0	1	1	0	0	0	0	0	0	0
Ctena decussata	0	0	0	0	0	0	0	0	0	0	0	0	0	0	0	0	0	0	0	0	0	0	0	0	0	0	0	0	0	0	0	0	0	0	0	0	0	0	0	0	0	2	0	0	0	0	0	0
Lucinella divaricata	0	0	1	0	0	0	1	0	0	0	0	0	0	0	1	0	0	0	0	0	0	0	0	0	0	2	2	0	0	3	0	0	0	0	0	0	1	2	0	0	0	0	0	0	0	0	0	0
Donacilla cornea	0	0	16	0	0	0	0	0	0	0	0	0	0	0	1	0	0	0	0	0	0	0	0	0	0	0	0	0	0	0	0	0	0	0	0	0	3	2	25	1	0	0	0	0	0	0	0	0
Donax venustus	0	0	0	0	0	0	0	0	0	0	0	0	0	0	0	0	0	0	0	0	0	0	0	0	1	0	1	0	0	0	0	0	0	0	0	0	0	0	0	0	0	0	0	0	0	0	0	0
Gouldia minima	1	0	3	0	1	0	0	0	4	0	0	0	0	0	0	1	0	0	0	0	0	0	0	0	4	6	0	4	3	0	0	0	0	0	0	0	0	6	0	5	3	6	0	0	0	0	0	0
Irus irus	0	0	0	0	0	0	0	0	0	0	0	0	0	0	0	0	0	0	2	0	0	0	0	0	0	0	0	0	0	0	0	0	0	0	0	0	0	0	0	0	0	0	0	0	0	0	0	0
Loripes lucinalis	0	0	0	0	0	0	0	0	0	0	0	0	0	0	0	0	0	0	0	0	0	0	0	0	0	0	0	0	2	0	0	0	0	0	0	0	1	69	0	0	5	10	0	0	0	0	0	0
Loripinus fragilis	0	0	0	0	0	8	0	0	0	0	0	0	0	0	1	1	0	0	0	0	0	0	0	0	0	0	0	0	0	0	0	0	0	0	0	0	0	0	0	0	0	2	0	0	0	0	0	0
Gibbomodiola adriatica	0	1	0	0	0	0	0	1	1	0	0	0	0	0	0	0	0	0	0	1	0	0	0	0	0	0	0	0	0	0	0	0	0	0	0	0	2	0	1	0	0	0	0	0	0	0	0	0
Modiolus barbatus	0	0	0	0	0	0	0	0	0	0	0	0	0	0	0	0	0	0	0	0	0	0	0	0	0	1	0	0	0	0	0	0	0	0	0	0	0	4	3	0	1	0	0	0	0	0	0	0
Montacuta substriata	0	0	0	0	1	0	0	0	0	0	0	0	0	0	0	0	0	0	0	0	0	0	0	0	0	0	0	0	0	0	0	0	0	0	0	0	0	0	0	0	0	0	0	0	0	0	0	0
Musculus sp.	0	0	0	0	0	0	0	10	0	0	0	0	0	0	0	0	0	0	0	0	0	0	0	0	0	0	0	0	0	0	0	0	0	0	0	0	0	0	0	0	0	0	0	0	0	0	0	0
Myrtea spinifera	0	0	0	0	0	0	0	1	1	0	0	0	0	0	0	0	0	0	0	0	0	0	0	0	1	0	0	0	0	0	0	0	0	0	0	0	0	0	0	0	1	0	0	0	0	0	0	0
Kurtiella bidentata	0	0	0	0	0	0	2	0	0	0	0	0	0	0	0	0	0	0	0	0	0	0	0	0	0	0	0	1	2	0	0	0	0	0	0	0	0	5	0	0	0	0	0	0	0	0	0	0
Parvicardium exiguum	0	0	0	0	1	0	0	0	0	0	0	0	0	0	0	1	0	0	1	0	0	0	0	0	0	0	0	0	0	0	0	0	0	0	0	0	0	0	0	0	0	0	0	0	0	0	0	0
Pholas dactylus	0	0	0	0	0	0	0	0	0	0	0	0	0	0	0	0	0	0	1	0	0	0	0	0	0	0	0	0	0	0	0	0	0	0	0	0	0	0	0	0	0	0	0	0	0	0	0	0
Pitar rudis	0	0	0	0	0	0	0	0	0	0	0	0	0	0	0	0	0	0	0	0	2	0	0	0	0	0	0	0	0	0	0	0	0	0	0	0	0	0	0	0	0	0	0	0	0	0	0	0
Solen marginatus	0	0	0	0	0	1	0	0	0	0	0	0	0	0	0	0	0	0	0	0	0	0	0	0	0	0	0	0	0	0	0	0	0	0	0	0	5	0	2	0	0	0	0	0	0	0	0	0
Polititapes aureus	0	0	0	0	0	0	0	0	0	0	0	0	0	0	0	0	0	0	0	0	0	0	0	0	0	0	0	0	2	0	0	0	1	0	0	0	0	0	0	0	0	1	0	0	0	0	0	0
Ruditapes decussatus	0	0	0	0	0	0	3	0	0	0	0	0	0	0	0	0	0	0	0	0	1	0	0	0	0	0	0	0	0	0	0	0	0	0	0	0	0	0	0	0	0	1	0	0	0	0	0	0
Moerella donacina	0	1	0	0	0	0	0	0	0	0	0	0	0	0	0	0	0	0	0	0	0	0	0	0	0	0	0	0	0	0	0	0	0	0	0	0	0	0	0	0	0	0	0	0	0	0	0	0
Tellina planata	0	0	0	0	0	0	10	2	0	0	0	0	0	0	0	0	0	0	0	0	0	0	0	0	5	3	1	0	0	0	0	0	0	0	0	0	0	0	0	1	2	6	3	0	0	0	0	0
Tellina sp.	0	0	0	0	0	0	0	0	0	0	0	0	0	0	0	0	0	0	0	0	0	0	0	0	0	0	0	0	0	0	0	0	0	0	0	0	0	1	0	0	0	0	0	0	0	0	0	0
Tellina tenuis	42	41	9	5	8	4	0	0	0	0	0	0	8	11	5	0	0	3	0	0	0	0	0	0	88	13	9	0	0	2	0	0	0	0	0	0	0	10	2	0	0	0	0	0	0	0	0	0
Thracia phaseolina	0	0	0	0	0	0	0	0	0	0	0	0	0	0	0	0	0	0	0	0	0	0	0	0	0	0	0	0	0	0	0	0	0	0	0	0	1	1	0	0	0	0	0	0	0	0	0	0
Thyasira flexuosa	7	5	3	0	0	4	0	0	0	0	0	0	0	0	0	0	0	0	0	0	0	0	0	0	0	0	0	0	0	0	0	0	0	0	0	0	0	0	0	0	0	0	0	0	0	0	0	0
Timoclea ovata	0	0	0	1	0	0	0	0	0	0	0	0	0	0	0	0	0	0	0	0	1	0	0	0	0	0	0	0	0	0	0	0	0	0	0	0	0	0	1	0	1	0	0	0	0	0	0	0
Venus casina	0	0	0	0	0	0	0	0	0	0	0	0	0	0	0	0	0	0	0	0	0	0	0	0	0	0	0	0	0	0	0	0	0	0	0	0	0	5	1	0	0	0	0	0	0	0	0	0
Acteon tornatilis	0	0	0	0	0	0	0	0	0	0	0	0	0	0	0	0	0	0	0	0	0	0	0	0	0	0	0	0	0	0	0	0	0	0	0	0	1	0	1	0	0	0	0	0	0	0	0	0
Barleeia unifasciata	1	0	0	0	0	0	0	0	0	0	0	0	0	0	0	0	0	0	0	0	0	0	0	0	0	0	0	0	0	0	0	0	0	0	0	0	0	0	0	0	0	0	0	0	0	0	0	0
Bela nebula	0	0	0	0	0	0	0	0	0	0	0	0	1	0	0	0	0	0	0	0	0	0	0	0	0	0	0	0	0	0	0	0	0	0	0	0	0	0	0	0	0	0	0	0	0	0	0	0
Bittium reticulatum	0	5	71	155	2000	415	109	86	58	0	14	2	42	0	0	2311	421	451	12	66	125	7	0	0	31	47	15	2114	1620	2120	2	6	8	1	3	4	340	356	539	996	2266	4072	54	10	21	0	3	1
Cerithiopsis sp.	1	0	0	0	0	0	0	0	0	0	0	0	0	0	0	0	0	0	0	0	0	0	0	0	0	0	0	0	0	0	0	0	0	0	0	0	0	0	0	0	0	0	0	0	0	0	0	0
Cerithiopsis tubercularis	0	1	0	0	0	0	0	0	0	0	0	0	0	0	0	0	0	0	0	0	0	0	0	0	0	0	0	0	0	0	0	0	0	0	0	0	0	0	0	0	0	0	0	0	0	0	0	0
Cerithium vulgatum	0	0	0	0	1	0	3	6	0	0	0	0	1	0	0	0	0	0	0	9	1	0	0	0	0	1	0	4	3	0	0	0	0	0	0	0	0	0	0	0	3	1	0	0	1	1	0	0
Chrysallida sp.	0	0	0	0	0	0	0	0	0	0	0	0	0	0	0	0	0	0	0	1	0	0	0	0	0	0	0	0	0	0	0	0	0	0	0	0	0	0	0	0	0	0	0	0	0	0	0	0
Circulus sp.	0	0	0	0	0	0	0	0	1	0	0	0	0	0	0	0	0	0	0	0	0	0	0	0	0	0	0	0	0	0	0	0	0	0	0	0	0	0	0	0	0	0	0	0	0	0	0	0
Cyclope neritea	0	0	0	0	2	0	39	90	10	1	2	2	0	0	0	1	0	0	3	21	56	0	0	0	0	0	0	2	2	9	33	28	9	3	6	1	0	1	1	0	0	0	12	26	22	1	0	4
Ebala pointeli	0	0	0	0	0	0	1	1	0	0	0	0	0	0	0	0	0	0	0	0	0	0	0	0	0	0	0	0	0	0	0	0	0	0	0	0	0	0	0	0	0	0	0	0	0	0	0	0
Epitonium clathrus	0	0	0	0	0	0	0	0	0	0	0	0	1	0	0	0	0	0	0	0	0	0	0	0	0	0	0	1	0	0	0	0	0	0	0	0	1	0	0	0	0	0	0	0	0	0	0	0
Gibbula albida	0	0	0	0	0	0	0	0	0	0	0	0	2	0	0	0	0	0	0	0	0	0	0	0	0	0	0	0	0	0	0	0	0	0	0	0	0	0	0	0	0	0	0	0	0	0	0	0
Gibbula ardens	0	0	0	0	0	0	0	0	0	0	0	0	0	0	0	0	0	0	0	0	0	0	0	0	0	0	0	0	0	0	0	0	0	0	0	0	0	2	3	0	0	0	0	0	0	0	0	0
Hydrobia acuta	0	3	0	0	0	0	1450	850	310	300	165	300	0	0	0	7	0	0	76	487	2156	632	314	460	0	0	0	0	3	3	4	273	391	250	629	337	1	0	0	17	18	11	1533	592	2388	370	500	141
Mangelia attenuata	0	0	0	0	0	0	0	0	0	0	0	0	0	0	0	0	0	0	0	0	0	0	0	0	0	0	0	0	1	0	0	0	0	0	0	0	2	2	7	0	0	0	0	0	0	0	0	0
Nassarius incrassatus	0	0	0	0	0	0	0	0	0	0	0	0	0	0	0	0	0	0	0	0	0	0	0	0	0	0	1	0	0	0	0	0	0	0	0	0	0	0	0	0	0	0	0	0	0	0	0	0
Megastomia conoidea	0	0	0	0	0	0	0	0	0	0	0	0	0	0	0	0	0	0	0	0	0	0	0	0	0	0	0	0	0	0	0	0	0	0	0	0	1	0	0	0	0	0	0	0	0	0	0	0
Potamides conicus	0	0	0	0	0	0	21	23	18	26	26	21	0	0	0	7	1	0	4	111	97	96	36	61	0	0	0	0	0	0	60	49	66	39	80	53	0	0	0	0	0	0	71	43	32	75	58	51
Pusillina marginata	0	0	0	0	0	0	0	0	0	0	0	0	0	0	0	0	0	0	0	0	0	0	0	0	0	0	0	0	2	0	0	0	0	0	0	0	0	0	0	0	0	0	0	0	0	0	0	0
Pusillina radiata	0	3	1	0	3	0	1	0	0	0	0	0	0	0	0	0	0	0	0	0	0	0	0	0	1	3	0	4	1	3	0	0	0	0	0	0	31	3	24	0	0	0	0	0	0	0	0	0
Raphitoma echinata	0	0	0	0	0	0	0	0	0	0	0	0	0	0	0	0	0	0	0	0	0	0	0	0	0	0	0	0	0	0	0	0	0	0	0	0	0	0	1	0	0	0	0	0	0	0	0	0
Rissoa guerinii	0	0	0	0	0	0	0	0	0	0	0	0	0	0	0	0	0	0	0	0	1	0	0	0	0	0	0	0	0	0	0	0	0	0	0	0	0	0	0	0	0	0	0	0	0	0	0	0
Rissoa monodonta	0	0	0	0	0	0	0	0	0	0	0	0	0	0	0	0	0	0	0	0	0	0	2	0	0	0	0	0	0	0	0	0	0	0	0	0	0	0	0	0	0	0	1	0	4	0	0	0
Rissoa membranacea	0	0	0	0	0	0	0	0	0	0	0	0	0	0	0	0	0	0	0	0	0	0	0	0	0	0	0	0	0	0	0	1	0	0	0	0	0	0	0	0	0	0	0	0	0	0	0	0
Rissoa lia	0	0	0	0	0	0	0	0	0	0	0	0	0	0	0	0	0	0	0	0	0	0	0	0	0	0	0	0	0	0	0	0	0	0	0	0	3	0	0	0	0	0	0	0	0	0	0	0
Rissoa splendida	0	0	0	0	0	0	0	0	0	0	0	0	0	0	0	0	0	0	0	0	0	0	0	0	0	0	0	0	0	0	0	0	0	0	0	0	4	3	12	0	0	0	0	0	0	0	0	0
Rissoa variabilis	0	0	0	0	0	0	0	0	0	0	0	0	0	0	0	0	0	0	0	0	0	0	0	0	0	0	0	0	0	0	0	0	0	0	0	0	33	24	57	0	0	0	0	0	0	0	0	0
Rissoa ventricosa	0	0	2	0	0	0	42	22	2	0	0	0	11	0	0	1	0	0	0	8	18	0	4	0	2	6	5	1	19	1	0	1	1	0	0	0	25	32	13	1	0	10	2	0	4	0	0	0
Tricolia pullus	0	0	11	0	0	0	0	0	0	0	0	0	9	0	1	0	0	0	1	0	0	0	0	0	3	1	0	0	2	1	0	0	0	0	0	0	22	16	28	0	0	0	0	0	0	0	0	0
Monophorus perversus	0	0	0	0	0	0	0	0	0	0	0	0	0	0	0	0	0	0	0	0	0	0	0	0	0	0	0	0	0	0	0	0	0	0	0	0	1	1	0	0	0	0	0	0	0	0	0	0
Trophonopsis muricata	0	0	0	0	0	0	0	0	0	0	0	0	1	0	1	0	0	0	0	0	0	0	0	0	0	0	0	0	0	0	0	0	0	0	0	0	0	1	0	0	0	0	0	0	0	0	0	0
Truncatella subcylindrica	0	0	0	0	0	0	0	0	0	0	0	0	0	0	0	0	0	0	0	0	0	0	0	0	0	0	0	0	0	0	0	0	0	0	0	0	1	0	1	0	0	0	0	0	0	0	0	0
Turbonilla delicata	0	0	0	0	1	0	0	0	0	0	0	0	0	0	0	2	0	0	0	0	0	0	0	0	0	0	0	1	0	1	0	0	0	0	0	0	0	0	0	0	1	8	0	0	1	0	0	0
Turbonilla lactea	0	1	0	0	0	0	0	0	0	0	0	0	0	0	0	1	0	0	0	0	0	0	0	0	0	0	0	0	0	0	0	0	0	0	0	0	1	2	6	0	0	0	0	0	0	0	0	0
Pyrgostylus striatulus	0	0	0	0	1	0	0	1	0	0	0	0	0	0	0	0	0	0	0	0	0	0	0	0	0	0	0	0	0	0	0	0	0	0	0	0	0	0	0	0	0	0	0	0	0	0	0	0
Fustiaria rubescens	0	0	0	0	0	0	0	0	0	0	0	0	0	0	0	0	0	0	0	0	0	0	0	0	0	0	0	0	0	0	0	0	0	0	0	0	1	0	0	0	0	0	0	0	0	0	0	0

## Sheet: BIOMASS
	WI1R1	WI1R2	WI1R3	WI2R1	WI2R2	WI2R3	WI3R1	WI3R2	WI3R3	WI4R1	WI4R2	WI4R3	SP1R1	SP1R2	SP1R3	SP2R1	SP2R2	SP2R3	SP3R1	SP3R2	SP3R3	SP4R1	SP4R2	SP4R3	SU1R1	SU1R2	SU1R3	SU2R1	SU2R2	SU2R3	SU3R1	SU3R2	SU3R3	SU4R1	SU4R2	SU4R3	AU1R1	AU1R2	AU1R3	AU2R1	AU2R2	AU2R3	AU3R1	AU3R2	AU3R3	AU4R1	AU4R2	AU4R3
Abra segmentum	0	0	0	0	0	0	17.41	12.65	8.21	1.16	0.46	1.79	0	0	0	0	0.079	0	1.7292	1.2699	3.2893	1.4508	1.4562	2.1494	0	0	0	0.0481	0.4456	0.2671	0	0	4.5298	1.5074	1.131	2.2999	0	0.0102	0	0.1449	2.4315	0.1393	7.8763	8.1519	10.876	2.16	2.134	1.181
Axinulus croulinensis	0	0	0	0	0	0	0	0	0	0	0	0	0	0	0	0	0	0	0	0	0	0	0	0	0	0	0	0	0	0	0	0	0	0	0	0	0	0	0.0093	0	0	0	0	0	0	0	0	0
Cerastoderma glaucum	0	0	0	0	7.44	0	16.49	13.16	16.15	4.4	1.29	6	0	0	0	0	0.0013	0.0802	3.1172	2.1866	0	0	0	1.7115	0	0	0	0	8.3975	0	4.3281	13.997	7.2878	1.8056	2.3147	0	0	0	0	0	0	4.105	4.3102	15.1266	0	3.543	2.272	10.016
Chamelea gallina	0.2622	2.49	0.0017	0	0	0	0	0	0	0	0	0	0	0	0	0	0	0	0	0	0	0	0	0	0	0.8059	0.1042	0	0	0	0	0	0	0	0	0	0	0	0	0	0	0	0	0	0	0	0	0
Clausinella fasciata	0	0	0	0	0	0	0	0	0	0	0	0	0	0	0	0	0	0	0	0	0	0	0	0	0	0.0778	0	0	0	0	0	0	0	0	0	0	0	0	0	0	0	0	0	0	0	0	0	0
Corbula gibba	0	0	0	0	0	0	0	0	0	0	0	0	0	0	0	0	0	0	0	0	0	0	0	0	0	0	0	0.0002	0	0	0	0	0	0	0	0	0	0	0	0.0145	0.014	0	0	0	0	0	0	0
Ctena decussata	0	0	0	0	0	0	0	0	0	0	0	0	0	0	0	0	0	0	0	0	0	0	0	0	0	0	0	0	0	0	0	0	0	0	0	0	0	0	0	0	0	0.0193	0	0	0	0	0	0
Lucinella divaricata	0	0	0.0229	0	0	0	0.0908	0	0	0	0	0	0	0	0.0219	0	0	0	0	0	0	0	0	0	0	0.002	0.1042	0	0	0.1148	0	0	0	0	0	0	0.0321	0.0309	0	0	0	0	0	0	0	0	0	0
Donacilla cornea	0	0	0.0268	0	0	0	0	0	0	0	0	0	0	0	0.5783	0	0	0	0	0	0	0	0	0	0	0	0	0	0	0	0	0	0	0	0	0	0.0162	0.132	6.2337	0.0212	0	0	0	0	0	0	0	0
Donax venustus	0	0	0	0	0	0	0	0	0	0	0	0	0	0	0	0	0	0	0	0	0	0	0	0	0.0803	0	0.0362	0	0	0	0	0	0	0	0	0	0	0	0	0	0	0	0	0	0	0	0	0
Gouldia minima	0.0175	0	0.0024	0	0.002	0	0	0	0.0196	0	0	0	0	0	0	0.0012	0	0	0	0	0	0	0	0	0.0014	0.0173	0	0.0024	0.0056	0	0	0	0	0	0	0	0	0.0038	0	0.0293	0.053	0.0621	0	0	0	0	0	0
Irus irus	0	0	0	0	0	0	0	0	0	0	0	0	0	0	0	0	0	0	0.0061	0	0	0	0	0	0	0	0	0	0	0	0	0	0	0	0	0	0	0	0	0	0	0	0	0	0	0	0	0
Loripes lucinalis	0	0	0	0	0	0	0	0	0	0	0	0	0	0	0	0	0	0	0	0	0	0	0	0	0	0	0	0	0.0244	0	0	0	0	0	0	0	0.0095	0.1842	0	0	0.1155	0.1575	0	0	0	0	0	0
Loripinus fragilis	0	0	0	0	0	0.1602	0	0	0	0	0	0	0	0	0.1281	0.1528	0	0	0	0	0	0	0	0	0	0	0	0	0	0	0	0	0	0	0	0	0	0	0	0	0	0.002	0	0	0	0	0	0
Gibbomodiola adriatica	0	1e-05	0	0	0	0	0	1e-05	0.001	0	0	0	0	0	0	0	0	0	0	0.0052	0	0	0	0	0	0	0	0	0	0	0	0	0	0	0	0	0.0083	0	0.0008	0	0	0	0	0	0	0	0	0
Modiolus barbatus	0	0	0	0	0	0	0	0	0	0	0	0	0	0	0	0	0	0	0	0	0	0	0	0	0	8.9875	0	0	0	0	0	0	0	0	0	0	0	0.0447	0.0228	0	0.1184	0	0	0	0	0	0	0
Montacuta substriata	0	0	0	0	0.0028	0	0	0	0	0	0	0	0	0	0	0	0	0	0	0	0	0	0	0	0	0	0	0	0	0	0	0	0	0	0	0	0	0	0	0	0	0	0	0	0	0	0	0
Musculus sp.	0	0	0	0	0	0	0	0.0048	0	0	0	0	0	0	0	0	0	0	0	0	0	0	0	0	0	0	0	0	0	0	0	0	0	0	0	0	0	0	0	0	0	0	0	0	0	0	0	0
Myrtea spinifera	0	0	0	0	0	0	0	0.0006	0.0015	0	0	0	0	0	0	0	0	0	0	0	0	0	0	0	0.0017	0	0	0	0	0	0	0	0	0	0	0	0	0	0	0	0.0096	0	0	0	0	0	0	0
Kurtiella bidentata	0	0	0	0	0	0	0.0088	0	0	0	0	0	0	0	0	0	0	0	0	0	0	0	0	0	0	0	0	0.0029	0.0039	0	0	0	0	0	0	0	0	0.0086	0	0	0	0	0	0	0	0	0	0
Parvicardium exiguum	0	0	0	0	0.0181	0	0	0	0	0	0	0	0	0	0	0.0077	0	0	2.0733	0	0	0	0	0	0	0	0	0	0	0	0	0	0	0	0	0	0	0	0	0	0	0	0	0	0	0	0	0
Pholas dactylus	0	0	0	0	0	0	0	0	0	0	0	0	0	0	0	0	0	0	0.3143	0	0	0	0	0	0	0	0	0	0	0	0	0	0	0	0	0	0	0	0	0	0	0	0	0	0	0	0	0
Pitar rudis	0	0	0	0	0	0	0	0	0	0	0	0	0	0	0	0	0	0	0	0	0.2276	0	0	0	0	0	0	0	0	0	0	0	0	0	0	0	0	0	0	0	0	0	0	0	0	0	0	0
Solen marginatus	0	0	0	0	0	0.588	0	0	0	0	0	0	0	0	0	0	0	0	0	0	0	0	0	0	0	0	0	0	0	0	0	0	0	0	0	0	1.4052	0	0.4538	0	0	0	0	0	0	0	0	0
Polititapes aureus	0	0	0	0	0	0	0	0	0	0	0	0	0	0	0	0	0	0	0	0	0	0	0	0	0	0	0	0	0.0083	0	0	0	0.7914	0	0	0	0	0	0	0	0	0.0339	0	0	0	0	0	0
Ruditapes decussatus	0	0	0	0	0	0	0.0163	0	0	0	0	0	0	0	0	0	0	0	0	0	0.1166	0	0	0	0	0	0	0	0	0	0	0	0	0	0	0	0	0	0	0	0	12.64	0	0	0	0	0	0
Moerella donacina	0	0.24	0	0	0	0	0	0	0	0	0	0	0	0	0	0	0	0	0	0	0	0	0	0	0	0	0	0	0	0	0	0	0	0	0	0	0	0	0	0	0	0	0	0	0	0	0	0
Tellina planata	0	0	0	0	0	0	6.32	1.43	0	0	0	0	0	0	0	0	0	0	0	0	0	0	0	0	1.0354	0.4923	0.1952	0	0	0	0	0	0	0	0	0	0	0	0	0.0588	0.0097	0.0211	1.9036	0	0	0	0	0
Tellina sp.	0	0	0	0	0	0	0	0	0	0	0	0	0	0	0	0	0	0	0	0	0	0	0	0	0	0	0	0	0	0	0	0	0	0	0	0	0	0.0095	0	0	0	0	0	0	0	0	0	0
Tellina tenuis	0.2408	0.0267	0.2678	0.0024	0.0142	0.0164	0	0	0	0	0	0	0.1582	0.4045	0.2513	0	0	0.1911	0	0	0	0	0	0	1.919	0.2383	0.4113	0	0	0.1217	0	0	0	0	0	0	0	0.0104	0.0037	0	0	0	0	0	0	0	0	0
Thracia phaseolina	0	0	0	0	0	0	0	0	0	0	0	0	0	0	0	0	0	0	0	0	0	0	0	0	0	0	0	0	0	0	0	0	0	0	0	0	0.0346	0.023	0	0	0	0	0	0	0	0	0	0
Thyasira flexuosa	0.004	0.0006	0.001	0	0	0.0028	0	0	0	0	0	0	0	0	0	0	0	0	0	0	0	0	0	0	0	0	0	0	0	0	0	0	0	0	0	0	0	0	0	0	0	0	0	0	0	0	0	0
Timoclea ovata	0	0	0	0.0258	0	0	0	0	0	0	0	0	0	0	0	0	0	0	0	0	0.1183	0	0	0	0	0	0	0	0	0	0	0	0	0	0	0	0	0	0.1094	0	0.0281	0	0	0	0	0	0	0
Venus casina	0	0	0	0	0	0	0	0	0	0	0	0	0	0	0	0	0	0	0	0	0	0	0	0	0	0	0	0	0	0	0	0	0	0	0	0	0	0.2659	0.01	0	0	0	0	0	0	0	0	0
Acteon tornatilis	0	0	0	0	0	0	0	0	0	0	0	0	0	0	0	0	0	0	0	0	0	0	0	0	0	0	0	0	0	0	0	0	0	0	0	0	0.0185	0	0.0094	0	0	0	0	0	0	0	0	0
Barleeia unifasciata	1e-05	0	0	0	0	0	0	0	0	0	0	0	0	0	0	0	0	0	0	0	0	0	0	0	0	0	0	0	0	0	0	0	0	0	0	0	0	0	0	0	0	0	0	0	0	0	0	0
Bela nebula	0	0	0	0	0	0	0	0	0	0	0	0	0.0095	0	0	0	0	0	0	0	0	0	0	0	0	0	0	0	0	0	0	0	0	0	0	0	0	0	0	0	0	0	0	0	0	0	0	0
Bittium reticulatum	0	0.0222	0.2668	1.24	27.82	3.32	0.62	0.92	0.2	0	0.039	0.0141	0.2269	0	0	17.6037	3.0256	3.4446	0.0736	1.286	1.9283	0.0558	0	0	0.1333	0.1656	0.0723	12.7416	15.1977	11.0052	0.0561	0.1709	0.1145	0.0056	0.0065	0.0153	2.2128	2.0798	3.7878	4.658	9.4979	16.3511	1.0321	0.1117	0.2944	0	0.019	0.0061
Cerithiopsis sp.	0.0006	0	0	0	0	0	0	0	0	0	0	0	0	0	0	0	0	0	0	0	0	0	0	0	0	0	0	0	0	0	0	0	0	0	0	0	0	0	0	0	0	0	0	0	0	0	0	0
Cerithiopsis tubercularis	0	1e-05	0	0	0	0	0	0	0	0	0	0	0	0	0	0	0	0	0	0	0	0	0	0	0	0	0	0	0	0	0	0	0	0	0	0	0	0	0	0	0	0	0	0	0	0	0	0
Cerithium vulgatum	0	0	0	0	0.0196	0	0.6835	2.06	0	0	0	0	1.1545	0	0	0	0	0	0	3.8207	0.0041	0	0	0	0	0.07525	0	0.8061	0.1969	0	0	0	0	0	0	0	0	0	0	0	0.2177	0.0847	0	0	0.4641	0.0295	0	0
Chrysallida sp.	0	0	0	0	0	0	0	0	0	0	0	0	0	0	0	0	0	0	0	0.0027	0	0	0	0	0	0	0	0	0	0	0	0	0	0	0	0	0	0	0	0	0	0	0	0	0	0	0	0
Circulus sp.	0	0	0	0	0	0	0	0	0.0007	0	0	0	0	0	0	0	0	0	0	0	0	0	0	0	0	0	0	0	0	0	0	0	0	0	0	0	0	0	0	0	0	0	0	0	0	0	0	0
Cyclope neritea	0	0	0	0	1.0378	0	6.54	9.18	3.13	0.5678	0.4017	0.1417	0	0	0	1.0028	0	0	1.1515	3.3721	7.4033	0	0	0	0	0	0	0.2317	0.0974	2.3912	2.2713	8.375	2.456	0.5855	0.8309	0.1018	0	0.0038	0.0374	0	0	0	2.4011	4.3379	3.1779	0.0368	0	0.1829
Ebala pointeli	0	0	0	0	0	0	1e-05	1e-05	0	0	0	0	0	0	0	0	0	0	0	0	0	0	0	0	0	0	0	0	0	0	0	0	0	0	0	0	0	0	0	0	0	0	0	0	0	0	0	0
Epitonium clathrus	0	0	0	0	0	0	0	0	0	0	0	0	0.0041	0	0	0	0	0	0	0	0	0	0	0	0	0	0	0.0092	0	0	0	0	0	0	0	0	0.2022	0	0	0	0	0	0	0	0	0	0	0
Gibbula albida	0	0	0	0	0	0	0	0	0	0	0	0	0.26	0	0	0	0	0	0	0	0	0	0	0	0	0	0	0	0	0	0	0	0	0	0	0	0	0	0	0	0	0	0	0	0	0	0	0
Gibbula ardens	0	0	0	0	0	0	0	0	0	0	0	0	0	0	0	0	0	0	0	0	0	0	0	0	0	0	0	0	0	0	0	0	0	0	0	0	0	0.0286	0.0118	0	0	0	0	0	0	0	0	0
Hydrobia acuta	0	0.0021	0	0	0	0	1.8	1.13	0.4	0.39	0.214	0.39	0	0	0	0.0137	0	0	0.0878	0.7255	3.0042	0.8275	0.5658	0.709	0	0	0	0	0.0031	0.0044	0.0089	0.5183	0.4861	0.3104	0.8589	0.4421	0.0001	0	0	0.0288	0.0335	0.0193	2.3014	0.391	2.4687	0.4127	0.6535	0.1569
Mangelia attenuata	0	0	0	0	0	0	0	0	0	0	0	0	0	0	0	0	0	0	0	0	0	0	0	0	0	0	0	0	0.0027	0	0	0	0	0	0	0	0.0158	0.0178	0.1248	0	0	0	0	0	0	0	0	0
Nassarius incrassatus	0	0	0	0	0	0	0	0	0	0	0	0	0	0	0	0	0	0	0	0	0	0	0	0	0	0	0.0158	0	0	0	0	0	0	0	0	0	0	0	0	0	0	0	0	0	0	0	0	0
Megastomia conoidea	0	0	0	0	0	0	0	0	0	0	0	0	0	0	0	0	0	0	0	0	0	0	0	0	0	0	0	0	0	0	0	0	0	0	0	0	0.015	0	0	0	0	0	0	0	0	0	0	0
Potamides conicus	0	0	0	0	0	0	2.46	2.09	2.35	1.73	2.8	0.7	0	0	0	0.3061	0.1026	0	0.4104	5.201	6.4578	2.6572	2.6533	1.8367	0	0	0	0	0	0	6.2855	4.445	2.5578	2.6076	6.1226	3.4604	0	0	0	0	0	0	2.8023	3.052	2.1276	5.1643	3.6102	4.2083
Pusillina marginata	0	0	0	0	0	0	0	0	0	0	0	0	0	0	0	0	0	0	0	0	0	0	0	0	0	0	0	0	0.0059	0	0	0	0	0	0	0	0	0	0	0	0	0	0	0	0	0	0	0
Pusillina radiata	0	0.0062	0.0025	0	0.0051	0	0.0023	0	0	0	0	0	0	0	0	0	0	0	0	0	0	0	0	0	0.0022	0.0046	0	0.0095	0.0018	0.0043	0	0	0	0	0	0	0.1007	0.0063	0.0664	0	0	0	0	0	0	0	0	0
Raphitoma echinata	0	0	0	0	0	0	0	0	0	0	0	0	0	0	0	0	0	0	0	0	0	0	0	0	0	0	0	0	0	0	0	0	0	0	0	0	0	0	0.1095	0	0	0	0	0	0	0	0	0
Rissoa guerinii	0	0	0	0	0	0	0	0	0	0	0	0	0	0	0	0	0	0	0	0	0.0037	0	0	0	0	0	0	0	0	0	0	0	0	0	0	0	0	0	0	0	0	0	0	0	0	0	0	0
Rissoa monodonta	0	0	0	0	0	0	0	0	0	0	0	0	0	0	0	0	0	0	0	0	0	0	0.0186	0	0	0	0	0	0	0	0	0	0	0	0	0	0	0	0	0	0	0	0.0045	0	0.0117	0	0	0
Rissoa membranacea	0	0	0	0	0	0	0	0	0	0	0	0	0	0	0	0	0	0	0	0	0	0	0	0	0	0	0	0	0	0	0	0.0215	0	0	0	0	0	0	0	0	0	0	0	0	0	0	0	0
Rissoa lia	0	0	0	0	0	0	0	0	0	0	0	0	0	0	0	0	0	0	0	0	0	0	0	0	0	0	0	0	0	0	0	0	0	0	0	0	0.0231	0	0	0	0	0	0	0	0	0	0	0
Rissoa splendida	0	0	0	0	0	0	0	0	0	0	0	0	0	0	0	0	0	0	0	0	0	0	0	0	0	0	0	0	0	0	0	0	0	0	0	0	0.0194	0.0095	0.0499	0	0	0	0	0	0	0	0	0
Rissoa variabilis	0	0	0	0	0	0	0	0	0	0	0	0	0	0	0	0	0	0	0	0	0	0	0	0	0	0	0	0	0	0	0	0	0	0	0	0	0.2383	0.1563	0.4683	0	0	0	0	0	0	0	0	0
Rissoa ventricosa	0	0	0.0191	0	0	0	0.2619	0.12	0.0041	0	0	0	0.0472	0	0	0.0009	0	0	0	0.1126	0.1725	0	0.0311	0	0.0224	0.0196	0.0262	0.004	0.1292	0.006	0	0.0075	0.0171	0	0	0	0.1373	0.1088	0.0791	0.0022	0	0.0226	0.0238	0	0.0512	0	0	0
Tricolia pullus	0	0	0.0336	0	0	0	0	0	0	0	0	0	0.599	0	0.0032	0	0	0	0.0016	0	0	0	0	0	0.0212	0.0045	0	0	0.0333	0.0074	0	0	0	0	0	0	0.205	0.0825	0.1807	0	0	0	0	0	0	0	0	0
Monophorus perversus	0	0	0	0	0	0	0	0	0	0	0	0	0	0	0	0	0	0	0	0	0	0	0	0	0	0	0	0	0	0	0	0	0	0	0	0	0.0028	0.0302	0	0	0	0	0	0	0	0	0	0
Trophonopsis muricata	0	0	0	0	0	0	0	0	0	0	0	0	0.0413	0	0.0175	0	0	0	0	0	0	0	0	0	0	0	0	0	0	0	0	0	0	0	0	0	0	0.0156	0	0	0	0	0	0	0	0	0	0
Truncatella subcylindrica	0	0	0	0	0	0	0	0	0	0	0	0	0	0	0	0	0	0	0	0	0	0	0	0	0	0	0	0	0	0	0	0	0	0	0	0	0.0058	0	0.0066	0	0	0	0	0	0	0	0	0
Turbonilla delicata	0	0	0	0	0.0021	0	0	0	0	0	0	0	0	0	0	0.0027	0	0	0	0	0	0	0	0	0	0	0	0.0028	0	0.0041	0	0	0	0	0	0	0	0	0	0	0.0006	0.0039	0	0	0.0001	0	0	0
Turbonilla lactea	0	0.0001	0	0	0	0	0	0	0	0	0	0	0	0	0	0.0006	0	0	0	0	0	0	0	0	0	0	0	0	0	0	0	0	0	0	0	0	0.0033	0.0031	0.0168	0	0	0	0	0	0	0	0	0
Pyrgostylus striatulus	0	0	0	0	0.0006	0	0	0.0026	0	0	0	0	0	0	0	0	0	0	0	0	0	0	0	0	0	0	0	0	0	0	0	0	0	0	0	0	0	0	0	0	0	0	0	0	0	0	0	0
Fustiaria rubescens	0	0	0	0	0	0	0	0	0	0	0	0	0	0	0	0	0	0	0	0	0	0	0	0	0	0	0	0	0	0	0	0	0	0	0	0	0.0043	0	0	0	0	0	0	0	0	0	0	0

## Sheet: UNITS
Abundance units:	ind./sample
Biomass units:	g/sample	(wet biomass, with shells)

## Sheet: SAMPLE LABELING
Sample	Survey	Site	Replicate
WI1R1	WI	1	1
WI1R2	WI	1	2
WI1R3	WI	1	3
WI2R1	WI	2	1
WI2R2	WI	2	2
WI2R3	WI	2	3
WI3R1	WI	3	1
WI3R2	WI	3	2
WI3R3	WI	3	3
WI4R1	WI	4	1
WI4R2	WI	4	2
WI4R3	WI	4	3
SP1R1	SP	1	1
SP1R2	SP	1	2
SP1R3	SP	1	3
SP2R1	SP	2	1
SP2R2	SP	2	2
SP2R3	SP	2	3
SP3R1	SP	3	1
SP3R2	SP	3	2
SP3R3	SP	3	3
SP4R1	SP	4	1
SP4R2	SP	4	2
SP4R3	SP	4	3
SU1R1	SU	1	1
SU1R2	SU	1	2
SU1R3	SU	1	3
SU2R1	SU	2	1
SU2R2	SU	2	2
SU2R3	SU	2	3
SU3R1	SU	3	1
SU3R2	SU	3	2
SU3R3	SU	3	3
SU4R1	SU	4	1
SU4R2	SU	4	2
SU4R3	SU	4	3
AU1R1	AU	1	1
AU1R2	AU	1	2
AU1R3	AU	1	3
AU2R1	AU	2	1
AU2R2	AU	2	2
AU2R3	AU	2	3
AU3R1	AU	3	1
AU3R2	AU	3	2
AU3R3	AU	3	3
AU4R1	AU	4	1
AU4R2	AU	4	2
AU4R3	AU	4	3
